# Supplementary material
Source: publisher site journal article supplement (https://www.dovepress.com/article/303938)
Supplement: Supplementary file 1 [file get_supplementary_file.php]

**Supplementary Table S1.** Participating hospitals

| No. | Institute |
| --- | --- |
| 1 | Shanghai Mental Health Center Affiliated to Shanghai Jiaotong University |
| 2 | No.6 Hospital Affiliated to Peking University |
| 3 | Harbin No.1 Specialized Hospital |
| 4 | No.1 Hospital Affiliated to Xian Jiaotong University |
| 5 | Center for Mental Health in Wuhan |
| 6 | Hangzhou No.7 People’s Hospital |
| 7 | Shandong Mental Health Center |
| 8 | Kangning Hospital in Shenzhen |
